# Supplementary material
Source: PubMed Central journal article supplement (PMC5313100)
Supplement: 10.1074_M116.747667_jbc.M116.747667-1.pdf [file 10.1074_M116.747667_jbc.M116.747667-1.pdf]

## Supplemental Figure 1

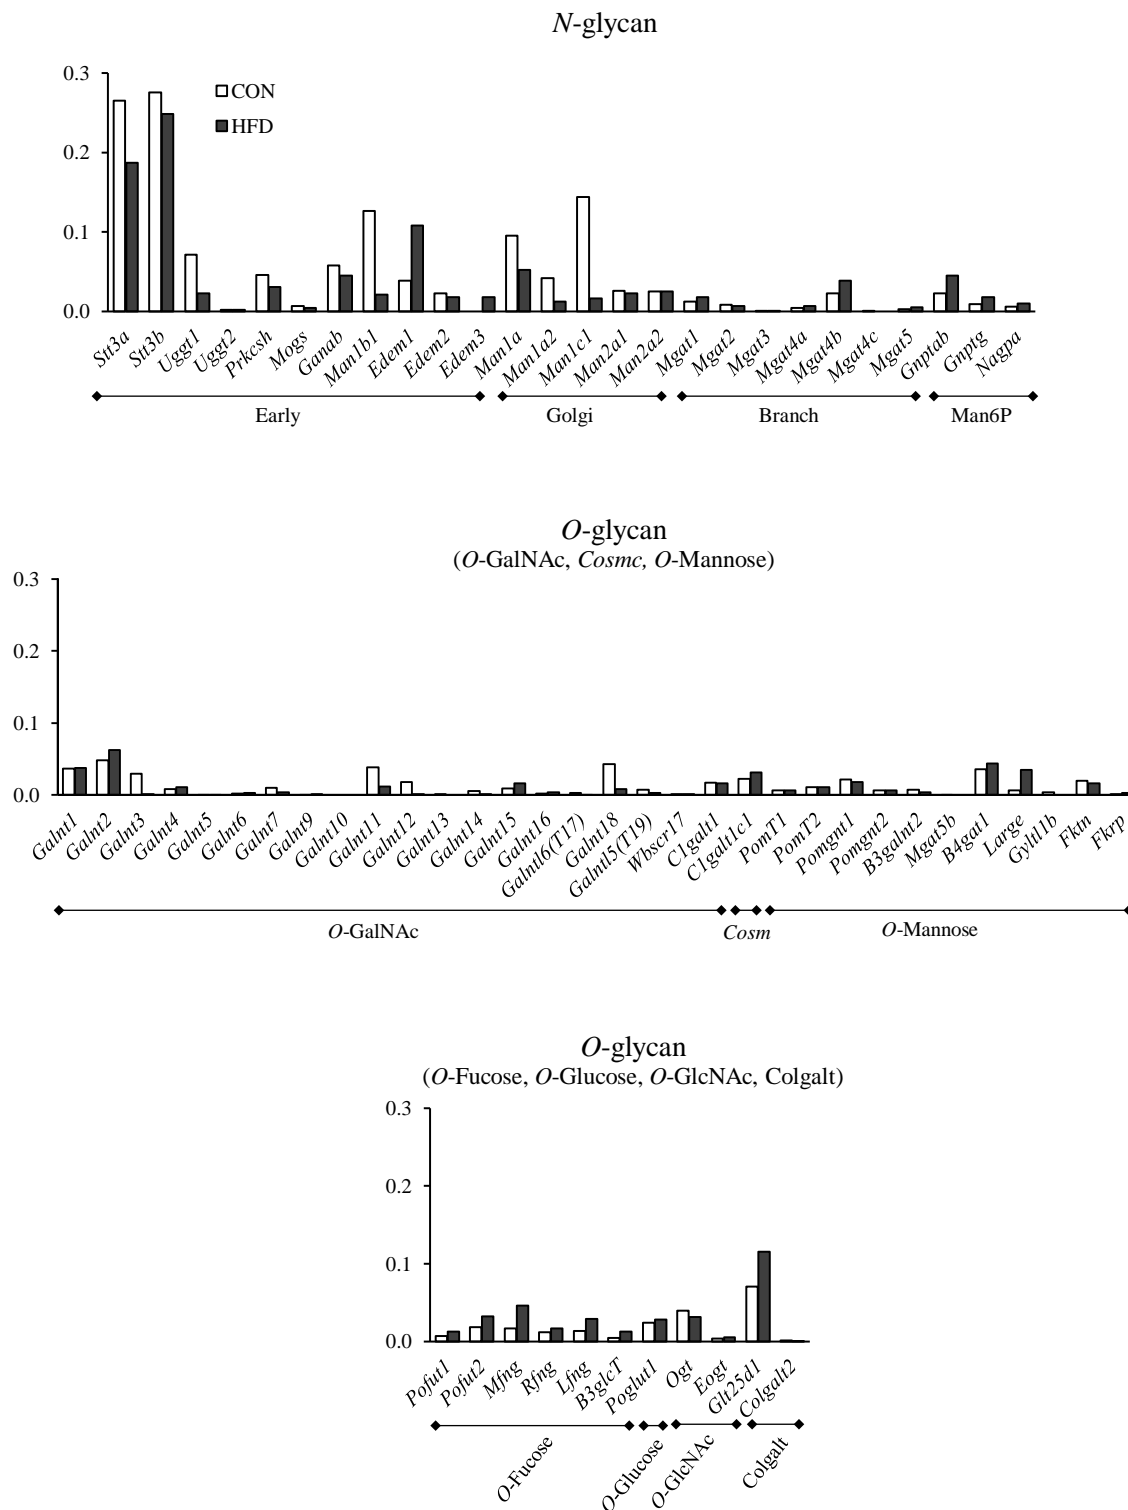

Supplemental Figure 1 mRNA abundance relative to house keeping genes (Actb, B2m, Gapdh, and Hsp90ab1).

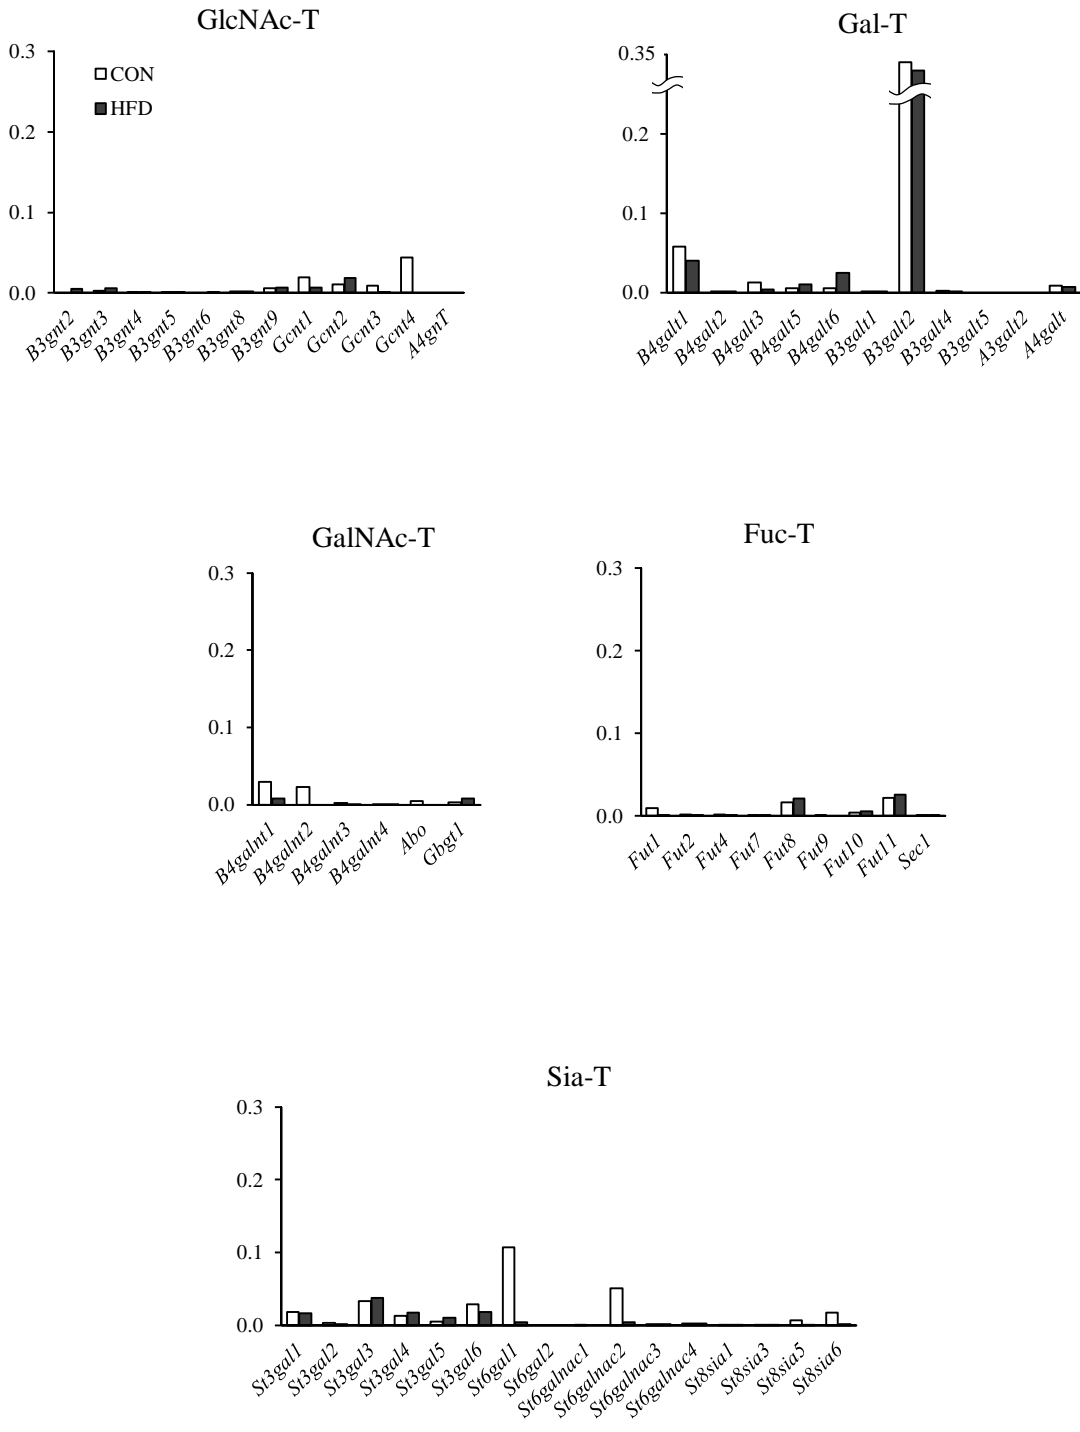

**Supplemental Figure 1** mRNA abundance relative to house keeping genes (Actb, B2m, Gapdh, and Hsp90ab1).

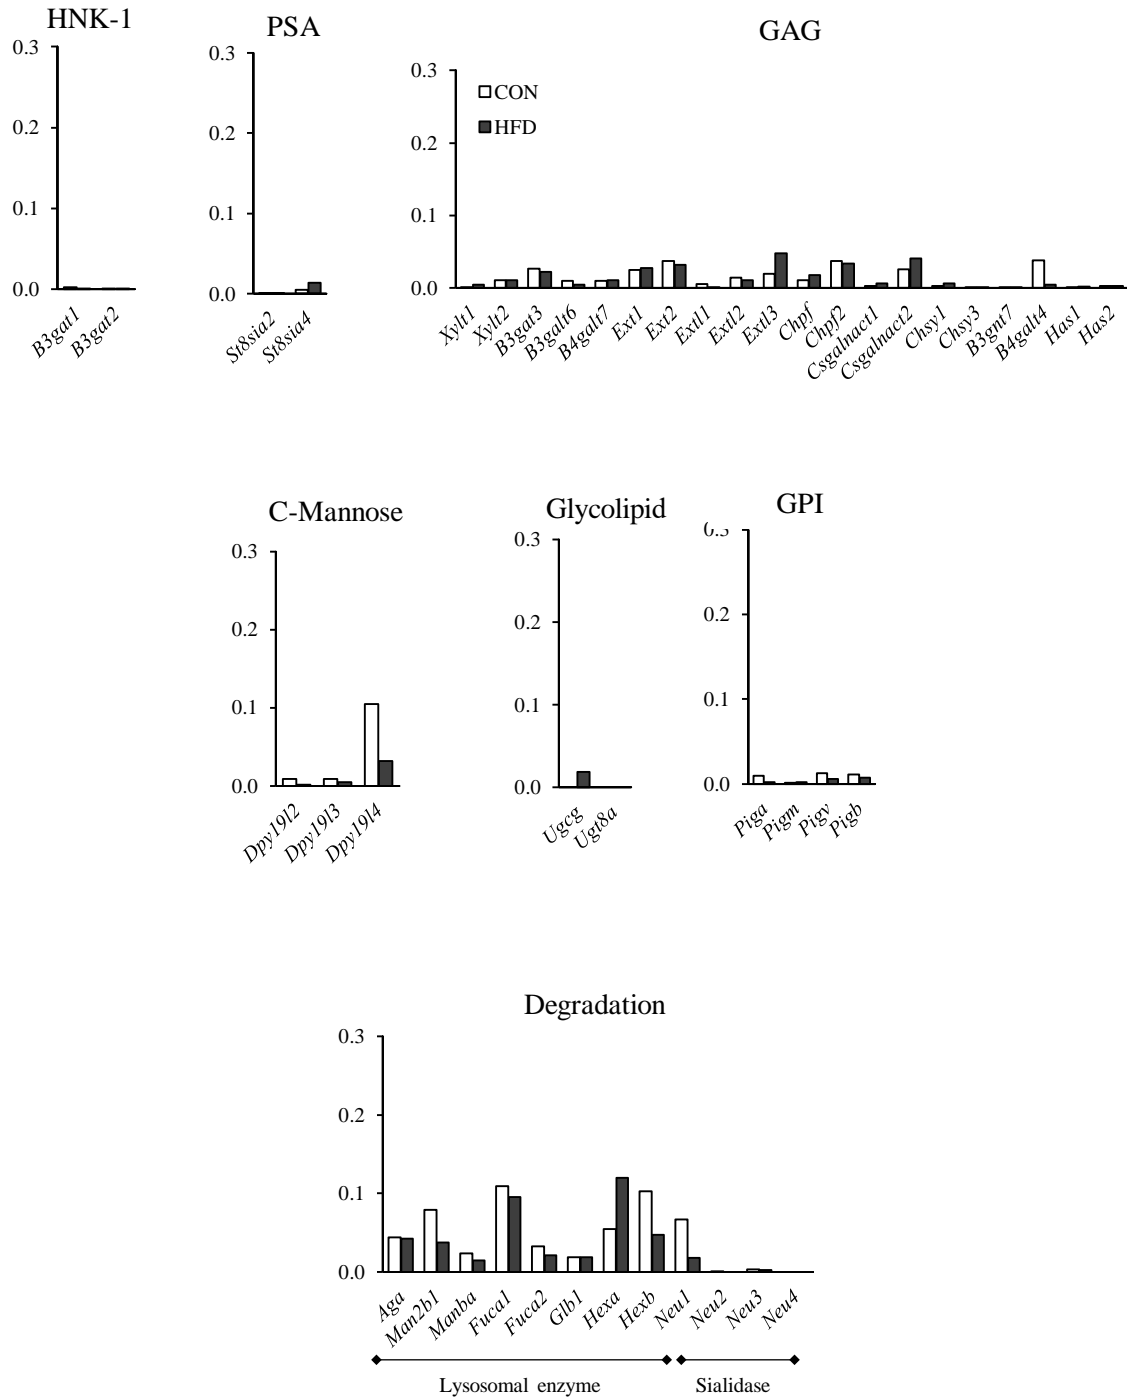

**Supplemental Figure 1** mRNA abundance relative to house keeping genes (Actb, B2m, Gapdh, and Hsp90ab1).

# Inhibitory role of $\alpha$ 2,6-Sialylation in Adipogenesis

Kaburagi T. et al.

## Supplemental Figure 2

| Gene symbol         | Category | Subcategory       | CON    | HFD    | Log Fold change (v.s. CON) |
|---------------------|----------|-------------------|--------|--------|----------------------------|
| <i>Stt3a</i>        | N-glycan | Early             | 0.2651 | 0.1867 | -0.51                      |
| <i>Stt3b</i>        | N-glycan | Early             | 0.2756 | 0.2481 | -0.15                      |
| <i>Uggt1</i>        | N-glycan | Early             | 0.0718 | 0.0227 | -1.66                      |
| <i>Uggt2</i>        | N-glycan | Early             | 0.0024 | 0.0018 | -0.45                      |
| <i>Prkcsb</i>       | N-glycan | Early             | 0.0460 | 0.0307 | -0.58                      |
| <i>Mogs</i>         | N-glycan | Early             | 0.0065 | 0.0043 | -0.59                      |
| <i>Ganab</i>        | N-glycan | Early             | 0.0578 | 0.0453 | -0.35                      |
| <i>Man1b1</i>       | N-glycan | Early             | 0.1264 | 0.0208 | -2.60                      |
| <i>Edem1</i>        | N-glycan | Early             | 0.0386 | 0.1078 | 1.48                       |
| <i>Edem2</i>        | N-glycan | Early             | 0.0226 | 0.0184 | -0.30                      |
| <i>Edem3</i>        | N-glycan | Early             | N.D.   | 0.0181 | -                          |
| <i>Man1a</i>        | N-glycan | Golgi mannosidase | 0.0956 | 0.0525 | -0.86                      |
| <i>Man1a2</i>       | N-glycan | Golgi mannosidase | 0.0423 | 0.0126 | -1.74                      |
| <i>Man1c1</i>       | N-glycan | Golgi mannosidase | 0.1440 | 0.0161 | -3.16                      |
| <i>Man2a1</i>       | N-glycan | Golgi mannosidase | 0.0263 | 0.0230 | -0.19                      |
| <i>Man2a2</i>       | N-glycan | Golgi mannosidase | 0.0254 | 0.0253 | -0.01                      |
| <i>Mgat1</i>        | N-glycan | Branch            | 0.0123 | 0.0178 | 0.54                       |
| <i>Mgat2</i>        | N-glycan | Branch            | 0.0081 | 0.0071 | -0.20                      |
| <i>Mgat3</i>        | N-glycan | Branch            | 0.0004 | 0.0001 | -1.71                      |
| <i>Mgat4a</i>       | N-glycan | Branch            | 0.0041 | 0.0071 | 0.78                       |
| <i>Mgat4b</i>       | N-glycan | Branch            | 0.0228 | 0.0386 | 0.76                       |
| <i>Mgat4c</i>       | N-glycan | Branch            | 0.0001 | N.D.   | -                          |
| <i>Mgat5</i>        | N-glycan | Branch            | 0.0027 | 0.0054 | 1.02                       |
| <i>Gnptab</i>       | N-glycan | Man6P             | 0.0231 | 0.0455 | 0.98                       |
| <i>Gnptg</i>        | N-glycan | Man6P             | 0.0089 | 0.0183 | 1.04                       |
| <i>Nagpa</i>        | N-glycan | Man6P             | 0.0060 | 0.0102 | 0.77                       |
| <i>Galnt1</i>       | O-Glycan | O-GalNAc          | 0.0366 | 0.0375 | 0.04                       |
| <i>Galnt2</i>       | O-Glycan | O-GalNAc          | 0.0488 | 0.0627 | 0.36                       |
| <i>Galnt3</i>       | O-Glycan | O-GalNAc          | 0.0296 | 0.0016 | -4.19                      |
| <i>Galnt4</i>       | O-Glycan | O-GalNAc          | 0.0085 | 0.0108 | 0.35                       |
| <i>Galnt5</i>       | O-Glycan | O-GalNAc          | 0.0001 | 0.0001 | 0.20                       |
| <i>Galnt6</i>       | O-Glycan | O-GalNAc          | 0.0022 | 0.0033 | 0.58                       |
| <i>Galnt7</i>       | O-Glycan | O-GalNAc          | 0.0104 | 0.0036 | -1.53                      |
| <i>Galnt9</i>       | O-Glycan | O-GalNAc          | 0.0008 | 0.0017 | 1.07                       |
| <i>Galnt10</i>      | O-Glycan | O-GalNAc          | N.D.   | N.D.   | -                          |
| <i>Galnt11</i>      | O-Glycan | O-GalNAc          | 0.0390 | 0.0121 | -1.68                      |
| <i>Galnt12</i>      | O-Glycan | O-GalNAc          | 0.0182 | 0.0014 | -3.66                      |
| <i>Galnt13</i>      | O-Glycan | O-GalNAc          | 0.0015 | N.D.   | -                          |
| <i>Galnt14</i>      | O-Glycan | O-GalNAc          | 0.0057 | 0.0012 | -2.20                      |
| <i>Galnt15</i>      | O-Glycan | O-GalNAc          | 0.0095 | 0.0161 | 0.76                       |
| <i>Galnt16</i>      | O-Glycan | O-GalNAc          | 0.0023 | 0.0038 | 0.72                       |
| <i>Galnt16(T17)</i> | O-Glycan | O-GalNAc          | 0.0033 | 0.0006 | -2.53                      |
| <i>Galnt18</i>      | O-Glycan | O-GalNAc          | 0.0427 | 0.0080 | -2.41                      |
| <i>Galnt15(T19)</i> | O-Glycan | O-GalNAc          | 0.0071 | 0.0027 | -1.41                      |
| <i>Wbscr17</i>      | O-Glycan | O-GalNAc          | 0.0011 | 0.0013 | 0.21                       |
| <i>Clgalt1</i>      | O-Glycan | O-GalNAc          | 0.0177 | 0.0163 | -0.12                      |
| <i>Clgalt1c1</i>    | O-Glycan | <i>Cosmc</i>      | 0.0228 | 0.0315 | 0.46                       |
| <i>PomT1</i>        | O-Glycan | O-Mannose         | 0.0064 | 0.0064 | 0.01                       |
| <i>PomT2</i>        | O-Glycan | O-Mannose         | 0.0115 | 0.0110 | -0.07                      |
| <i>Pomgnt1</i>      | O-Glycan | O-Mannose         | 0.0215 | 0.0181 | -0.25                      |
| <i>Pomgnt2</i>      | O-Glycan | O-Mannose         | 0.0068 | 0.0069 | 0.04                       |
| <i>B3galnt2</i>     | O-Glycan | O-Mannose         | 0.0078 | 0.0038 | -1.02                      |
| <i>Mgat5b</i>       | O-Glycan | O-Mannose         | 0.0001 | N.D.   | -                          |

|                 |          |           |        |        |       |
|-----------------|----------|-----------|--------|--------|-------|
| <i>B4gat1</i>   | O-Glycan | O-Mannose | 0.0358 | 0.0440 | 0.30  |
| <i>Large</i>    | O-Glycan | O-Mannose | 0.0069 | 0.0347 | 2.33  |
| <i>Gylt11b</i>  | O-Glycan | O-Mannose | 0.0041 | N.D.   | -     |
| <i>Fktn</i>     | O-Glycan | O-Mannose | 0.0200 | 0.0166 | -0.27 |
| <i>Fkrp</i>     | O-Glycan | O-Mannose | 0.0018 | 0.0027 | 0.62  |
| <i>Pofut1</i>   | O-Glycan | O-Fucose  | 0.0071 | 0.0130 | 0.87  |
| <i>Pofut2</i>   | O-Glycan | O-Fucose  | 0.0187 | 0.0327 | 0.81  |
| <i>Mfng</i>     | O-Glycan | O-Fucose  | 0.0170 | 0.0461 | 1.43  |
| <i>Rfng</i>     | O-Glycan | O-Fucose  | 0.0117 | 0.0166 | 0.51  |
| <i>Lfng</i>     | O-Glycan | O-Fucose  | 0.0138 | 0.0295 | 1.10  |
| <i>B3glcT</i>   | O-Glycan | O-Fucose  | 0.0050 | 0.0125 | 1.32  |
| <i>Poglut1</i>  | O-Glycan | O-Glucose | 0.0239 | 0.0283 | 0.24  |
| <i>Ogt</i>      | O-Glycan | O-GlcNAc  | 0.0396 | 0.0317 | -0.32 |
| <i>Eogt</i>     | O-Glycan | O-GlcNAc  | 0.0039 | 0.0055 | 0.49  |
| <i>Gl25d1</i>   | O-Glycan | Colgalt   | 0.0711 | 0.1158 | 0.70  |
| <i>Colgalt2</i> | O-Glycan | Colgalt   | 0.0011 | 0.0010 | -0.20 |
| <i>B3gnt2</i>   | GlcNAc-T |           | N.D.   | 0.0053 | -     |
| <i>B3gnt3</i>   | GlcNAc-T |           | 0.0025 | 0.0056 | 1.14  |
| <i>B3gnt4</i>   | GlcNAc-T |           | 0.0008 | 0.0008 | 0.07  |
| <i>B3gnt5</i>   | GlcNAc-T |           | 0.0002 | 0.0003 | 0.29  |
| <i>B3gnt6</i>   | GlcNAc-T |           | N.D.   | 0.0002 | -     |
| <i>B3gnt8</i>   | GlcNAc-T |           | 0.0017 | 0.0022 | 0.34  |
| <i>B3gnt9</i>   | GlcNAc-T |           | 0.0057 | 0.0068 | 0.26  |
| <i>Gcnt1</i>    | GlcNAc-T |           | 0.0195 | 0.0069 | -1.51 |
| <i>Gcnt2</i>    | GlcNAc-T |           | 0.0105 | 0.0189 | 0.84  |
| <i>Gcnt3</i>    | GlcNAc-T |           | 0.0094 | 0.0001 | -6.82 |
| <i>Gcnt4</i>    | GlcNAc-T |           | 0.0443 | N.D.   | -     |
| <i>A4gnT</i>    | GlcNAc-T |           | N.D.   | N.D.   | -     |
| <i>B4galt1</i>  | Gal-T    |           | 0.0582 | 0.0404 | -0.53 |
| <i>B4galt2</i>  | Gal-T    |           | 0.0013 | 0.0014 | 0.15  |
| <i>B4galt3</i>  | Gal-T    |           | 0.0127 | 0.0041 | -1.61 |
| <i>B4galt5</i>  | Gal-T    |           | 0.0053 | 0.0105 | 0.98  |
| <i>B4galt6</i>  | Gal-T    |           | 0.0055 | 0.0247 | 2.16  |
| <i>B3galt1</i>  | Gal-T    |           | 0.0018 | 0.0013 | -0.38 |
| <i>B3galt2</i>  | Gal-T    |           | 0.3410 | 0.3017 | -0.18 |
| <i>B3galt4</i>  | Gal-T    |           | 0.0022 | 0.0015 | -0.56 |
| <i>B3galt5</i>  | Gal-T    |           | N.D.   | N.D.   | -     |
| <i>A3galt2</i>  | Gal-T    |           | N.D.   | N.D.   | -     |
| <i>A4galt</i>   | Gal-T    |           | 0.0085 | 0.0075 | -0.18 |
| <i>B4galnt1</i> | GalNAc-T |           | 0.0294 | 0.0083 | -1.83 |
| <i>B4galnt2</i> | GalNAc-T |           | 0.0227 | N.D.   | -     |
| <i>B4galnt3</i> | GalNAc-T |           | 0.0024 | 0.0002 | -3.83 |
| <i>B4galnt4</i> | GalNAc-T |           | 0.0008 | 0.0001 | -2.47 |
| <i>Abo</i>      | GalNAc-T |           | 0.0045 | N.D.   | -     |
| <i>Gbgt1</i>    | GalNAc-T |           | 0.0031 | 0.0081 | 1.38  |
| <i>Fut1</i>     | Fuc-T    |           | 0.0094 | 0.0000 | -8.04 |
| <i>Fut2</i>     | Fuc-T    |           | 0.0014 | 0.0004 | -1.75 |
| <i>Fut4</i>     | Fuc-T    |           | 0.0018 | 0.0001 | -3.71 |
| <i>Fut7</i>     | Fuc-T    |           | 0.0002 | 0.0006 | 1.69  |
| <i>Fut8</i>     | Fuc-T    |           | 0.0162 | 0.0208 | 0.35  |
| <i>Fut9</i>     | Fuc-T    |           | 0.0007 | N.D.   | -     |
| <i>Fut10</i>    | Fuc-T    |           | 0.0039 | 0.0056 | 0.52  |
| <i>Fut11</i>    | Fuc-T    |           | 0.0218 | 0.0256 | 0.23  |
| <i>Sec1</i>     | Fuc-T    |           | 0.0008 | 0.0002 | -1.68 |
| <i>St3gal1</i>  | Sia-T    |           | 0.0183 | 0.0170 | -0.11 |
| <i>St3gal2</i>  | Sia-T    |           | 0.0030 | 0.0021 | -0.57 |
| <i>St3gal3</i>  | Sia-T    |           | 0.0331 | 0.0379 | 0.19  |
| <i>St3gal4</i>  | Sia-T    |           | 0.0133 | 0.0174 | 0.40  |
| <i>St3gal5</i>  | Sia-T    |           | 0.0053 | 0.0107 | 1.03  |
| <i>St3gal6</i>  | Sia-T    |           | 0.0285 | 0.0184 | -0.63 |
| <i>St6gal1</i>  | Sia-T    |           | 0.1070 | 0.0044 | -4.61 |

**Supplemental Figure 2** mRNA abundance relative to house keeping genes (Actb, B2m, Gapdh, and Hsp90ab1).

|                   |             |                     |        |        |       |
|-------------------|-------------|---------------------|--------|--------|-------|
| <i>St6gal2</i>    | Sia-T       |                     | N.D.   | N.D.   | -     |
| <i>St6galnac1</i> | Sia-T       |                     | 0.0001 | N.D.   | -     |
| <i>St6galnac2</i> | Sia-T       |                     | 0.0514 | 0.0046 | -3.49 |
| <i>St6galnac3</i> | Sia-T       |                     | 0.0016 | 0.0013 | -0.29 |
| <i>St6galnac4</i> | Sia-T       |                     | 0.0023 | 0.0023 | 0.02  |
| <i>St8sia1</i>    | Sia-T       |                     | 0.0004 | 0.0004 | -0.02 |
| <i>St8sia3</i>    | Sia-T       |                     | 0.0007 | 0.0002 | -1.94 |
| <i>St8sia5</i>    | Sia-T       |                     | 0.0071 | 0.0002 | -5.44 |
| <i>St8sia6</i>    | Sia-T       |                     | 0.0176 | 0.0014 | -3.64 |
| <i>B3gat1</i>     | HNK-1       |                     | 0.0020 | 0.0001 | -4.19 |
| <i>B3gat2</i>     | HNK-1       |                     | 0.0005 | 0.0003 | -0.97 |
| <i>St8sia2</i>    | PSA         |                     | 0.0004 | 0.0003 | -0.38 |
| <i>St8sia4</i>    | PSA         |                     | 0.0049 | 0.0140 | 1.51  |
| <i>Xylt1</i>      | GAG         | Core                | 0.0011 | 0.0045 | 2.04  |
| <i>Xylt2</i>      | GAG         | Core                | 0.0110 | 0.0102 | -0.11 |
| <i>B3gat3</i>     | GAG         | Core                | 0.0261 | 0.0222 | -0.23 |
| <i>B3galt6</i>    | GAG         | Core                | 0.0096 | 0.0045 | -1.10 |
| <i>B4galt7</i>    | GAG         | Core                | 0.0100 | 0.0103 | 0.05  |
| <i>Ext1</i>       | GAG         | Heparan sulfate     | 0.0246 | 0.0275 | 0.16  |
| <i>Ext2</i>       | GAG         | Heparan sulfate     | 0.0368 | 0.0316 | -0.22 |
| <i>Extl1</i>      | GAG         | Heparan sulfate     | 0.0053 | 0.0006 | -3.27 |
| <i>Extl2</i>      | GAG         | Heparan sulfate     | 0.0140 | 0.0109 | -0.37 |
| <i>Extl3</i>      | GAG         | Heparan sulfate     | 0.0192 | 0.0480 | 1.32  |
| <i>Chpf</i>       | GAG         | Chondroitin sulfate | 0.0107 | 0.0179 | 0.75  |
| <i>Chpf2</i>      | GAG         | Chondroitin sulfate | 0.0372 | 0.0339 | -0.13 |
| <i>Csgalnact1</i> | GAG         | Chondroitin sulfate | 0.0023 | 0.0062 | 1.43  |
| <i>Csgalnact2</i> | GAG         | Chondroitin sulfate | 0.0258 | 0.0402 | 0.64  |
| <i>Chsy1</i>      | GAG         | Chondroitin sulfate | 0.0024 | 0.0059 | 1.29  |
| <i>Chsy3</i>      | GAG         | Chondroitin sulfate | 0.0007 | 0.0003 | -1.07 |
| <i>B3gnt7</i>     | GAG         | Keratan sulfate     | 0.0008 | 0.0010 | 0.23  |
| <i>B4galt4</i>    | GAG         | Keratan sulfate     | 0.0379 | 0.0043 | -3.14 |
| <i>Has1</i>       | GAG         | Hyaluronic acid     | 0.0008 | 0.0021 | 1.43  |
| <i>Has2</i>       | GAG         | Hyaluronic acid     | 0.0023 | 0.0028 | 0.28  |
| <i>Dpy1911</i>    | C-Mannose   |                     | 0.0098 | 0.0196 | 1.00  |
| <i>Dpy1912</i>    | C-Mannose   |                     | 0.0085 | 0.0014 | -2.65 |
| <i>Dpy1913</i>    | C-Mannose   |                     | 0.0085 | 0.0051 | -0.75 |
| <i>Dpy1914</i>    | C-Mannose   |                     | 0.1043 | 0.0316 | -1.72 |
| <i>Ugcg</i>       | Glycolipid  |                     | 0.0188 | 0.0205 | 0.13  |
| <i>Ugt8a</i>      | Glycolipid  |                     | N.D.   | N.D.   | -     |
| <i>Piga</i>       | GPI         |                     | 0.0096 | 0.0020 | -2.25 |
| <i>Pigm</i>       | GPI         |                     | 0.0015 | 0.0017 | 0.24  |
| <i>Pigv</i>       | GPI         |                     | 0.0122 | 0.0060 | -1.01 |
| <i>Pigb</i>       | GPI         |                     | 0.0113 | 0.0071 | -0.68 |
| <i>Aga</i>        | Degradation | Lysosomal enzyme    | 0.0437 | 0.0426 | -0.04 |
| <i>Man2b1</i>     | Degradation | Lysosomal enzyme    | 0.0790 | 0.0375 | -1.08 |
| <i>Manba</i>      | Degradation | Lysosomal enzyme    | 0.0237 | 0.0151 | -0.65 |
| <i>Fuca1</i>      | Degradation | Lysosomal enzyme    | 0.1091 | 0.0957 | -0.19 |
| <i>Fuca2</i>      | Degradation | Lysosomal enzyme    | 0.0330 | 0.0217 | -0.60 |
| <i>Glb1</i>       | Degradation | Lysosomal enzyme    | 0.0190 | 0.0191 | 0.01  |
| <i>Hexa</i>       | Degradation | Lysosomal enzyme    | 0.0548 | 0.1199 | 1.13  |
| <i>Hexb</i>       | Degradation | Lysosomal enzyme    | 0.1032 | 0.0471 | -1.13 |
| <i>Neu1</i>       | Degradation | Sialidase           | 0.0668 | 0.0178 | -1.91 |
| <i>Neu2</i>       | Degradation | Sialidase           | 0.0004 | N.D.   | -     |
| <i>Neu3</i>       | Degradation | Sialidase           | 0.0036 | 0.0023 | -0.61 |
| <i>Neu4</i>       | Degradation | Sialidase           | N.D.   | N.D.   | -     |

**Supplemental Figure 2** mRNA abundance relative to house keeping genes (Actb, B2m, Gapdh, and Hsp90ab1). Fig. 1B shows down-regulated glycosyltransferases in HFD mice compared with CON mice, with mRNA abundance being greater than 0.1 in VATs of CON mice.

# Inhibitory role of $\alpha$ 2,6-Sialylation in Adipogenesis

Kaburagi T. et al.

## Supplemental Figure 3

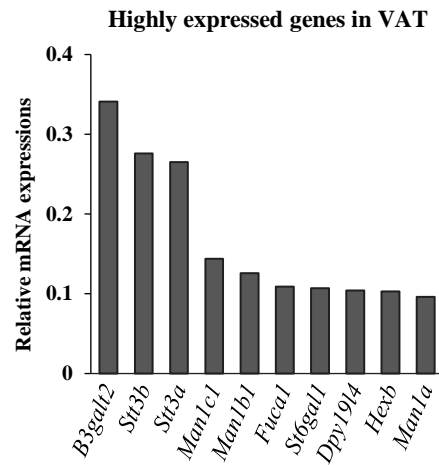

**Supplemental Figure 3** Highly expressed glycosyltransferase and related enzyme genes in VATs of CON mice (> 0.1 relative to housekeeping genes; average of *Actb*, *B2m*, *Gapdh*, and *Hsp90ab1*).

Kaburagi T. *et al.*



# Mascot Search Results

**User** : superuser  
**Email** : superuser  
**Search title** : 151015\_L\_294\_Kaburagi\_sample.mgf  
**MS data file** : C:\Xcalibur\data\2015\15-294\_Kaburagi\151015\_L\_294\_Kaburagi\_sample.mgf  
**Database** : SwissProt 2015\_09 (549215 sequences; 195767212 residues)  
**Taxonomy** : Mus musculus (house mouse) (16726 sequences)  
**Timestamp** : 15 Oct 2015 at 10:00:05 GMT  
**Enzyme** : Trypsin  
**Fixed modifications** : [Carbamidomethyl \(C\)](#)  
**Variable modifications** : [Oxidation \(M\)](#)  
**Mass values** : Monoisotopic  
**Protein Mass** : Unrestricted  
**Peptide Mass Tolerance** :  $\pm 1.5$  Da  
**Fragment Mass Tolerance** :  $\pm 0.8$  Da  
**Max Missed Cleavages** : 1  
**Instrument type** : ESI-TRAP  
**Number of queries** : 4969

**Protein hits** : [SPA3K\\_MOUSE](#) Serine protease inhibitor A3K OS=Mus musculus GN=Serpina3k PE=1 SV=2  
[ITIH4\\_MOUSE](#) Inter alpha-trypsin inhibitor, heavy chain 4 OS=Mus musculus GN=Itih4 PE=1 SV=2  
[K1C10\\_MOUSE](#) Keratin, type I cytoskeletal 10 OS=Mus musculus GN=Krt10 PE=1 SV=3  
[K2C75\\_MOUSE](#) Keratin, type II cytoskeletal 75 OS=Mus musculus GN=Krt75 PE=1 SV=1  
[ITB1\\_MOUSE](#) Integrin beta-1 OS=Mus musculus GN=Itgb1 PE=1 SV=1  
[MUC18\\_MOUSE](#) Cell surface glycoprotein MUC18 OS=Mus musculus GN=Mcam PE=1 SV=1  
[K2C1B\\_MOUSE](#) Keratin, type II cytoskeletal 1b OS=Mus musculus GN=Krt77 PE=1 SV=1  
[A2M\\_MOUSE](#) Alpha-2-macroglobulin OS=Mus musculus GN=A2m PE=1 SV=3  
[K2C8\\_MOUSE](#) Keratin, type II cytoskeletal 8 OS=Mus musculus GN=Krt8 PE=1 SV=4  
[CAD13\\_MOUSE](#) Cadherin-13 OS=Mus musculus GN=Cdh13 PE=1 SV=2

|                                                      | SwissProt | <a href="#">Decoy</a> | False discovery rate |
|------------------------------------------------------|-----------|-----------------------|----------------------|
| Peptide matches above identity threshold             | 51        | 5                     | 9.80 %               |
| Peptide matches above homology or identity threshold | 73        | 13                    | 17.81 %              |

## Select Summary Report

|                                                   |                                                    |                                                                |
|---------------------------------------------------|----------------------------------------------------|----------------------------------------------------------------|
| Format As                                         | Select Summary (protein hits) <input type="text"/> | <a href="#">Help</a>                                           |
| Significance threshold p<                         | <input type="text" value="0.05"/>                  | Max. number of hits <input type="text" value="AUTO"/>          |
| Standard scoring <input checked="" type="radio"/> | MudPIT scoring <input type="radio"/>               | Ions score or expect cut-off <input type="text" value="0.05"/> |
| Show pop-ups <input checked="" type="radio"/>     | Suppress pop-ups <input type="radio"/>             | Show sub-sets <input type="text" value="0"/>                   |
| Preferred taxonomy                                | <input type="text" value="All entries"/>           | Require bold red <input checked="" type="checkbox"/>           |

All queries
  Unassigned
  Below homology threshold
  Below identity threshold

1. [SPA3K\\_MOUSE](#) Mass: 47021 Score: 639 Matches: 26(26) Sequences: 9(9) emPAI: 1.05  
 Serine protease inhibitor A3K OS=Mus musculus GN=Serpina3k PE=1 SV=2

| Query                | Observed  | Mr(expt)  | Mr(calc)  | Delta   | Miss | Score | Expect   | Rank | Unique | Peptide                                                                                           |
|----------------------|-----------|-----------|-----------|---------|------|-------|----------|------|--------|---------------------------------------------------------------------------------------------------|
| <a href="#">1419</a> | 498.6588  | 995.3029  | 995.5764  | -0.2734 | 0    | 38    | 0.018    | 1    | U      | <a href="#">K.LSVSQVVK.A</a>                                                                      |
| <a href="#">1620</a> | 582.1216  | 1162.2286 | 1161.5951 | 0.6335  | 0    | 61    | 9.6e-005 | 1    | U      | <a href="#">K.TMEEILEGLK.F</a> <a href="#">1618</a>                                               |
| <a href="#">1650</a> | 590.0821  | 1178.1496 | 1177.5900 | 0.5596  | 0    | (61)  | 0.00011  | 1    | U      | <a href="#">K.TMEEILEGLK.F</a>                                                                    |
| <a href="#">1929</a> | 672.1654  | 1342.3163 | 1341.6928 | 0.6234  | 0    | 61    | 8.4e-005 | 1    | U      | <a href="#">K.DLQILAEFHEK.T</a> <a href="#">1928</a>                                              |
| <a href="#">1963</a> | 687.0972  | 1372.1798 | 1371.6955 | 0.4842  | 0    | 55    | 0.00042  | 1    | U      | <a href="#">R.LEEDVLPENGIK.E</a> <a href="#">1961</a> <a href="#">1962</a> <a href="#">1964</a>   |
| <a href="#">2433</a> | 815.9222  | 1629.8299 | 1628.8192 | 1.0107  | 0    | 102   | 6.3e-009 | 1    | U      | <a href="#">R.MQOVEASLQPETLR.K</a> <a href="#">2427</a> <a href="#">2431</a> <a href="#">2434</a> |
| <a href="#">2705</a> | 587.0090  | 1758.0051 | 1756.9141 | 1.0909  | 1    | 46    | 0.0022   | 1    | U      | <a href="#">R.MQOVEASLQPETLRK.W</a>                                                               |
| <a href="#">3307</a> | 1071.5416 | 2141.0687 | 2141.1328 | -0.0641 | 0    | 101   | 6.1e-009 | 1    | U      | <a href="#">K.AVLDVAETGTEAAAATGVIGGIR.K</a> <a href="#">3305</a> <a href="#">3308</a>             |
| <a href="#">3309</a> | 714.9377  | 2141.7914 | 2141.1328 | 0.6586  | 0    | (96)  | 2e-008   | 1    | U      | <a href="#">K.AVLDVAETGTEAAAATGVIGGIR.K</a> <a href="#">3311</a> <a href="#">3312</a>             |
| <a href="#">3348</a> | 1079.5435 | 2157.0724 | 2158.0219 | -0.9495 | 0    | 86    | 1.9e-007 | 1    | U      | <a href="#">R.ALYQTEAFTADFQOPTAK.N</a> <a href="#">3350</a>                                       |
| <a href="#">3440</a> | 1105.5427 | 2209.0709 | 2208.9739 | 0.0970  | 0    | 88    | 1.1e-007 | 1    | U      | <a href="#">K.ISFDPQDTFESEFYLDEK.R</a> <a href="#">3442</a> <a href="#">3443</a>                  |

2. [ITIH4\\_MOUSE](#) Mass: 104765 Score: 498 Matches: 13(13) Sequences: 8(8) emPAI: 0.30  
 Inter alpha-trypsin inhibitor, heavy chain 4 OS=Mus musculus GN=Itih4 PE=1 SV=2

| Query                | Observed | Mr(expt)  | Mr(calc)  | Delta   | Miss | Score | Expect   | Rank | Unique | Peptide                                                   |
|----------------------|----------|-----------|-----------|---------|------|-------|----------|------|--------|-----------------------------------------------------------|
| <a href="#">1233</a> | 426.3312 | 850.6479  | 850.4297  | 0.2182  | 0    | 54    | 0.00053  | 1    | U      | <a href="#">K.QYSAAVGR.G</a>                              |
| <a href="#">1298</a> | 439.4031 | 876.7917  | 876.4375  | 0.3542  | 0    | 69    | 2e-005   | 1    | U      | <a href="#">K.GSEMVVAGK.L</a>                             |
| <a href="#">1520</a> | 543.8196 | 1085.6246 | 1085.5717 | 0.0530  | 0    | 50    | 0.0014   | 1    | U      | <a href="#">R.SNQAELLPSK.S</a> <a href="#">1519</a>       |
| <a href="#">1569</a> | 561.4141 | 1120.8137 | 1120.5877 | 0.2260  | 0    | 51    | 0.0011   | 1    | U      | <a href="#">K.VQGVLYLATR.E</a> <a href="#">1570</a>       |
| <a href="#">1833</a> | 648.8306 | 1295.6466 | 1295.7085 | -0.0619 | 0    | 74    | 4.2e-006 | 1    | U      | <a href="#">K.LQDQGPVLLAK.V</a> <a href="#">1834</a>      |
| <a href="#">2126</a> | 738.0449 | 1474.0753 | 1472.7471 | 1.3282  | 0    | 65    | 3.6e-005 | 1    | U      | <a href="#">K.QSLVQATEENLNK.A</a>                         |
| <a href="#">2153</a> | 745.4677 | 1488.9207 | 1488.7824 | 0.1383  | 0    | 80    | 9.6e-007 | 1    | U      | <a href="#">K.LFVDPSQGLEVTGK.Y</a> <a href="#">2155</a>   |
| <a href="#">2799</a> | 904.6213 | 1807.2281 | 1806.8748 | 0.3533  | 0    | 54    | 0.00031  | 1    | U      | <a href="#">K.SQSEQDTVLNGDFIVR.Y</a> <a href="#">2800</a> |



|                                                                     |                             |                 |                 |                 |                 |             |              |               |             |               |                                       |
|---------------------------------------------------------------------|-----------------------------|-----------------|-----------------|-----------------|-----------------|-------------|--------------|---------------|-------------|---------------|---------------------------------------|
| 3.                                                                  | <a href="#">K1C10_MOUSE</a> | Mass: 57906     | Score: 125      | Matches: 2(2)   | Sequences: 2(2) | emPAI: 0.12 |              |               |             |               |                                       |
| Keratin, type I cytoskeletal 10 OS=Mus musculus GN=Krt10 PE=1 SV=3  |                             |                 |                 |                 |                 |             |              |               |             |               |                                       |
|                                                                     | <b>Query</b>                | <b>Observed</b> | <b>Mr(expt)</b> | <b>Mr(calc)</b> | <b>Delta</b>    | <b>Miss</b> | <b>Score</b> | <b>Expect</b> | <b>Rank</b> | <b>Unique</b> | <b>Peptide</b>                        |
|                                                                     | <a href="#">1525</a>        | 545.9040        | 1089.7935       | 1089.5237       | 0.2699          | 0           | 45           | 0.0051        | 1           | U             | R.VTMQNLNDR.L                         |
|                                                                     | <a href="#">1978</a>        | 691.4297        | 1380.8448       | 1380.6408       | 0.2040          | 0           | 83           | 6e-007        | 1           | U             | R.ALEESNYELEGK.I                      |
| 4.                                                                  | <a href="#">K2C75_MOUSE</a> | Mass: 59932     | Score: 119      | Matches: 2(2)   | Sequences: 2(2) | emPAI: 0.12 |              |               |             |               |                                       |
| Keratin, type II cytoskeletal 75 OS=Mus musculus GN=Krt75 PE=1 SV=1 |                             |                 |                 |                 |                 |             |              |               |             |               |                                       |
|                                                                     | <b>Query</b>                | <b>Observed</b> | <b>Mr(expt)</b> | <b>Mr(calc)</b> | <b>Delta</b>    | <b>Miss</b> | <b>Score</b> | <b>Expect</b> | <b>Rank</b> | <b>Unique</b> | <b>Peptide</b>                        |
|                                                                     | <a href="#">1845</a>        | 652.2750        | 1302.5354       | 1301.7078       | 0.8275          | 0           | 71           | 9.1e-006      | 1           | U             | R.SLDLDSIIAEVK.A                      |
|                                                                     | <a href="#">2130</a>        | 738.6626        | 1475.3106       | 1475.7984       | -0.4877         | 1           | 50           | 0.0011        | 2           | U             | R.FLEQQNKVLETK.W                      |
| 5.                                                                  | <a href="#">ITB1_MOUSE</a>  | Mass: 91424     | Score: 115      | Matches: 2(2)   | Sequences: 2(2) | emPAI: 0.08 |              |               |             |               |                                       |
| Integrin beta-1 OS=Mus musculus GN=Itgb1 PE=1 SV=1                  |                             |                 |                 |                 |                 |             |              |               |             |               |                                       |
|                                                                     | <b>Query</b>                | <b>Observed</b> | <b>Mr(expt)</b> | <b>Mr(calc)</b> | <b>Delta</b>    | <b>Miss</b> | <b>Score</b> | <b>Expect</b> | <b>Rank</b> | <b>Unique</b> | <b>Peptide</b>                        |
|                                                                     | <a href="#">1444</a>        | 508.4224        | 1014.8302       | 1014.5710       | 0.2592          | 0           | 63           | 8.2e-005      | 1           | U             | K.SAVTTVVNPK.Y                        |
|                                                                     | <a href="#">1584</a>        | 570.8734        | 1139.7323       | 1139.5095       | 0.2228          | 0           | 52           | 0.00078       | 1           | U             | R.DNTNEIYSGK.F                        |
| 6.                                                                  | <a href="#">MUC18_MOUSE</a> | Mass: 72470     | Score: 96       | Matches: 2(2)   | Sequences: 2(2) | emPAI: 0.10 |              |               |             |               |                                       |
| Cell surface glycoprotein MUC18 OS=Mus musculus GN=Mcam PE=1 SV=1   |                             |                 |                 |                 |                 |             |              |               |             |               |                                       |
|                                                                     | <b>Query</b>                | <b>Observed</b> | <b>Mr(expt)</b> | <b>Mr(calc)</b> | <b>Delta</b>    | <b>Miss</b> | <b>Score</b> | <b>Expect</b> | <b>Rank</b> | <b>Unique</b> | <b>Peptide</b>                        |
|                                                                     | <a href="#">1543</a>        | 555.8283        | 1109.6419       | 1108.6353       | 1.0067          | 0           | 50           | 0.0012        | 1           | U             | K.GPVLQLNVR.R                         |
|                                                                     | <a href="#">3029</a>        | 649.2312        | 1944.6718       | 1944.0065       | 0.6653          | 0           | 46           | 0.0019        | 1           | U             | K.APEEPTIQANVVGIVHVD.R                |
| 7.                                                                  | <a href="#">K2C1B_MOUSE</a> | Mass: 61379     | Score: 72       | Matches: 2(2)   | Sequences: 1(1) | emPAI: 0.06 |              |               |             |               |                                       |
| Keratin, type II cytoskeletal 1b OS=Mus musculus GN=Krt77 PE=1 SV=1 |                             |                 |                 |                 |                 |             |              |               |             |               |                                       |
|                                                                     | <b>Query</b>                | <b>Observed</b> | <b>Mr(expt)</b> | <b>Mr(calc)</b> | <b>Delta</b>    | <b>Miss</b> | <b>Score</b> | <b>Expect</b> | <b>Rank</b> | <b>Unique</b> | <b>Peptide</b>                        |
|                                                                     | <a href="#">2130</a>        | 738.6626        | 1475.3106       | 1474.7780       | 0.5327          | 0           | 72           | 7.9e-006      | 1           | U             | R.FLEQQNQVLQTK.W <a href="#">2129</a> |
| <b>Proteins matching the same set of peptides:</b>                  |                             |                 |                 |                 |                 |             |              |               |             |               |                                       |
|                                                                     | <a href="#">K2C1_MOUSE</a>  | Mass: 66079     | Score: 72       | Matches: 2(2)   | Sequences: 1(1) |             |              |               |             |               |                                       |
| Keratin, type II cytoskeletal 1 OS=Mus musculus GN=Krt1 PE=1 SV=4   |                             |                 |                 |                 |                 |             |              |               |             |               |                                       |
|                                                                     | <a href="#">K2C71_MOUSE</a> | Mass: 57860     | Score: 72       | Matches: 2(2)   | Sequences: 1(1) |             |              |               |             |               |                                       |
| Keratin, type II cytoskeletal 71 OS=Mus musculus GN=Krt71 PE=1 SV=1 |                             |                 |                 |                 |                 |             |              |               |             |               |                                       |
|                                                                     | <a href="#">K2C73_MOUSE</a> | Mass: 59502     | Score: 72       | Matches: 2(2)   | Sequences: 1(1) |             |              |               |             |               |                                       |
| Keratin, type II cytoskeletal 73 OS=Mus musculus GN=Krt73 PE=1 SV=1 |                             |                 |                 |                 |                 |             |              |               |             |               |                                       |
|                                                                     | <a href="#">K2C74_MOUSE</a> | Mass: 55340     | Score: 72       | Matches: 2(2)   | Sequences: 1(1) |             |              |               |             |               |                                       |
| Keratin, type II cytoskeletal 74 OS=Mus musculus GN=Krt74 PE=3 SV=1 |                             |                 |                 |                 |                 |             |              |               |             |               |                                       |
| 8.                                                                  | <a href="#">A2M_MOUSE</a>   | Mass: 167116    | Score: 40       | Matches: 1(1)   | Sequences: 1(1) | emPAI: 0.02 |              |               |             |               |                                       |
| Alpha-2-macroglobulin OS=Mus musculus GN=A2m PE=1 SV=3              |                             |                 |                 |                 |                 |             |              |               |             |               |                                       |
|                                                                     | <b>Query</b>                | <b>Observed</b> | <b>Mr(expt)</b> | <b>Mr(calc)</b> | <b>Delta</b>    | <b>Miss</b> | <b>Score</b> | <b>Expect</b> | <b>Rank</b> | <b>Unique</b> | <b>Peptide</b>                        |
|                                                                     | <a href="#">2038</a>        | 706.5985        | 1411.1825       | 1411.7500       | -0.5675         | 0           | 40           | 0.01          | 1           | U             | K.TVQGAFFGVPVYK.D                     |
| 9.                                                                  | <a href="#">K2C8_MOUSE</a>  | Mass: 54531     | Score: 35       | Matches: 1(1)   | Sequences: 1(1) | emPAI: 0.06 |              |               |             |               |                                       |
| Keratin, type II cytoskeletal 8 OS=Mus musculus GN=Krt8 PE=1 SV=4   |                             |                 |                 |                 |                 |             |              |               |             |               |                                       |
|                                                                     | <b>Query</b>                | <b>Observed</b> | <b>Mr(expt)</b> | <b>Mr(calc)</b> | <b>Delta</b>    | <b>Miss</b> | <b>Score</b> | <b>Expect</b> | <b>Rank</b> | <b>Unique</b> | <b>Peptide</b>                        |
|                                                                     | <a href="#">1987</a>        | 692.6489        | 1383.2833       | 1382.7194       | 0.5639          | 1           | 35           | 0.041         | 1           | U             | K.SLNNKFASFIDK.V                      |
| 10.                                                                 | <a href="#">CAD13_MOUSE</a> | Mass: 78536     | Score: 34       | Matches: 1(1)   | Sequences: 1(1) | emPAI: 0.04 |              |               |             |               |                                       |
| Cadherin-13 OS=Mus musculus GN=Cdh13 PE=1 SV=2                      |                             |                 |                 |                 |                 |             |              |               |             |               |                                       |
|                                                                     | <b>Query</b>                | <b>Observed</b> | <b>Mr(expt)</b> | <b>Mr(calc)</b> | <b>Delta</b>    | <b>Miss</b> | <b>Score</b> | <b>Expect</b> | <b>Rank</b> | <b>Unique</b> | <b>Peptide</b>                        |
|                                                                     | <a href="#">1591</a>        | 573.1916        | 1144.3687       | 1143.6248       | 0.7440          | 0           | 34           | 0.049         | 1           | U             | K.VNSDGTLVALR.N                       |
